# Supplementary material for: Enhancing the Performance of Triboelectric Generator: A Novel Approach Using Solid–Liquid Interface-Treated Foam and Metal Contacts
Source: MDPI journal article supplement (doi:10.3390/polym15102392), 2023-05-20
Supplement: s1 [file s1]

# Enhancing the Performance of Triboelectric Generator: A Novel Approach Using Solid-Liquid Interface-Treated Foam and Metal Contacts

Quang Tan Nguyen <sup>1</sup>, Duy Linh Vu <sup>2</sup>, Chau Duy Le <sup>1</sup> and Kyoung Kwan Ahn <sup>2,\*</sup>

<sup>1</sup> Graduate School of Mechanical Engineering, University of Ulsan, 93, Daehak-ro, Nam-gu, Ulsan 44610, Republic of Korea

<sup>2</sup> School of Mechanical Engineering, University of Ulsan, 93, Daehak-ro, Nam-gu, Ulsan 44610, Republic of Korea

\* Correspondence: kkahn@ulsan.ac.kr

**Table S1.** Peak voltage and current density of various mechanical energy harvesters

| Types                   | Active materials                                     | Size                 | Voltage (V) | Current density (A/m <sup>2</sup> ) | Refs      |
|-------------------------|------------------------------------------------------|----------------------|-------------|-------------------------------------|-----------|
| Piezoelectric Generator | C/PDMS/AuNPs                                         | 3.5 cm x 8.5 cm      | 6 V         | 2.35.10 <sup>-4</sup>               | [62]      |
|                         | CMC/PDMS/CNT                                         | 3.3 cm x 2.5 cm      | 30          | 6.06.10 <sup>-4</sup>               | [63]      |
|                         | Cellulose/SbSI                                       | 1 cm x 1 cm          | 0.024       | 2.10 <sup>-4</sup>                  | [64]      |
|                         | TOCN/PDMS                                            | 1 cm x 2 cm          | 60          | 5.05.10 <sup>-2</sup>               | [61]      |
|                         | MoS <sub>2</sub> /PVDF                               | 3 cm x 3 cm          | 50          | 3.33.10 <sup>-5</sup>               | [65]      |
|                         | ZnO nanowire array                                   | ~2 mm <sup>2</sup>   | 10-3        | 7.5.10 <sup>-5</sup>                | [66]      |
|                         | ZnO nanosheets/Zn: Al layered double hydroxide layer | 6 mm <sup>2</sup>    | 0.38        | 0.217                               | [67]      |
| Triboelectric Generator | Treated wood                                         | 4.5 cm x 4.5 cm      | 81          | 8.89.10 <sup>-4</sup>               | [68]      |
|                         | PCL/GO                                               | 4 cm x 4 cm          | 120         | 2.5.10 <sup>-3</sup>                | [69]      |
|                         | Ppy-MWCNT                                            | 6.25 cm <sup>2</sup> | 196.8       | 5.04.10 <sup>-2</sup>               | [70]      |
|                         | CA/PEI/LTV                                           | 5 cm x 5 cm          | 478         | 6.30.10 <sup>-2</sup>               | [34]      |
|                         | PA/nylon-66                                          | 6.8 cm x 7 cm        | 4500        | 8.40.10 <sup>-3</sup>               | [12]      |
|                         | FEP/Cu/Steel/Acrylic/ABS                             | 7.5 cm x 7 cm        | 149.5       | 4.11.10 <sup>-3</sup>               | [71]      |
|                         | PTFE/Acrylic                                         | 10 cm <sup>2</sup>   | 33          | 0.065                               | [72]      |
| Our generator           | Cellulose/Water/Al/Cu                                | 2 cm x 3.5 cm        | ~0.55       | 3.57                                | This work |

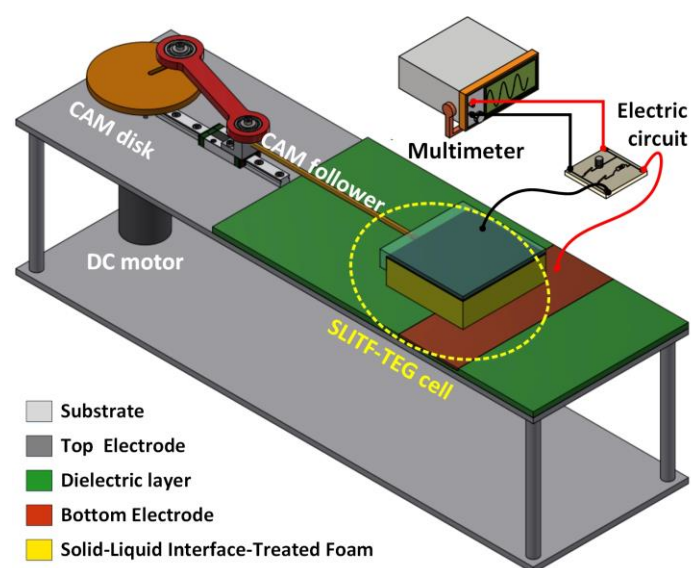

Figure S1. Experimental configuration of the SLITF-TEG

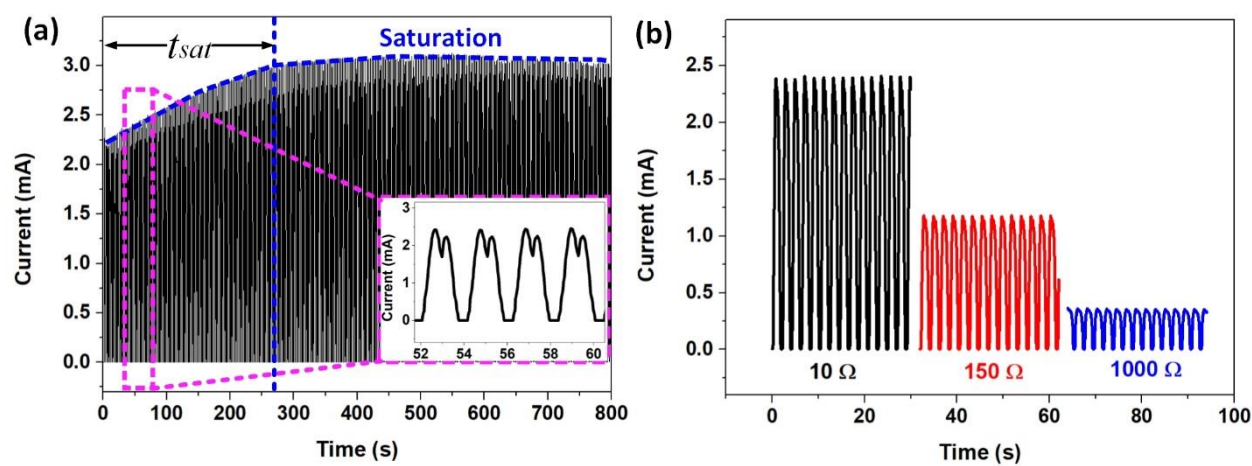

Figure S2. Electrical responses of the SLITF-TEG. The current outputs are measured under (a) the short-circuit condition and (b) various load resistances in the external circuit (10  $\Omega$ , 150  $\Omega$ , and 1000  $\Omega$ ).

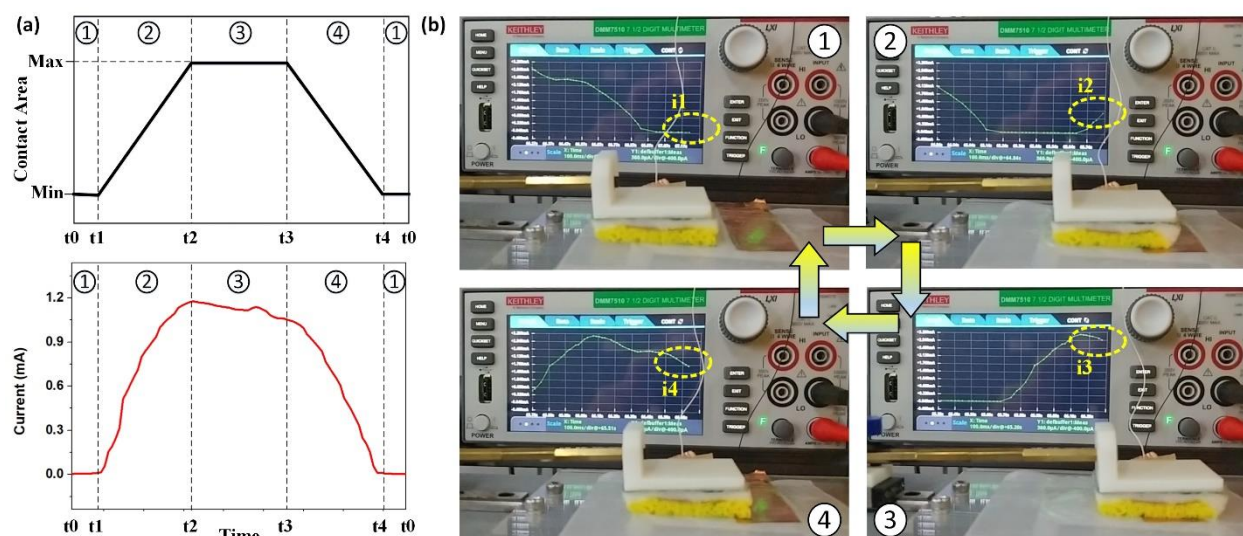

**Figure S3.** (a) Schematic of the contact area and short-circuit current of the SLITF-TEG. (b) Demonstration of the consistency between the electrical responses and the working mechanism of the SLITF-TEG.

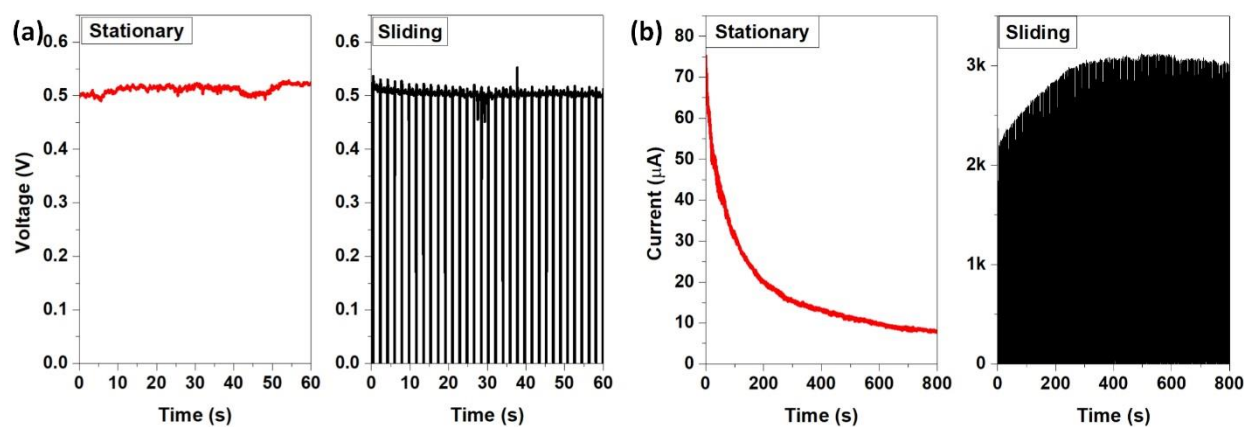

**Figure S4.** The comparison of (a) open-circuit voltage and (b) short-circuit current of the SLITF-TEG in the stationary and sliding modes.

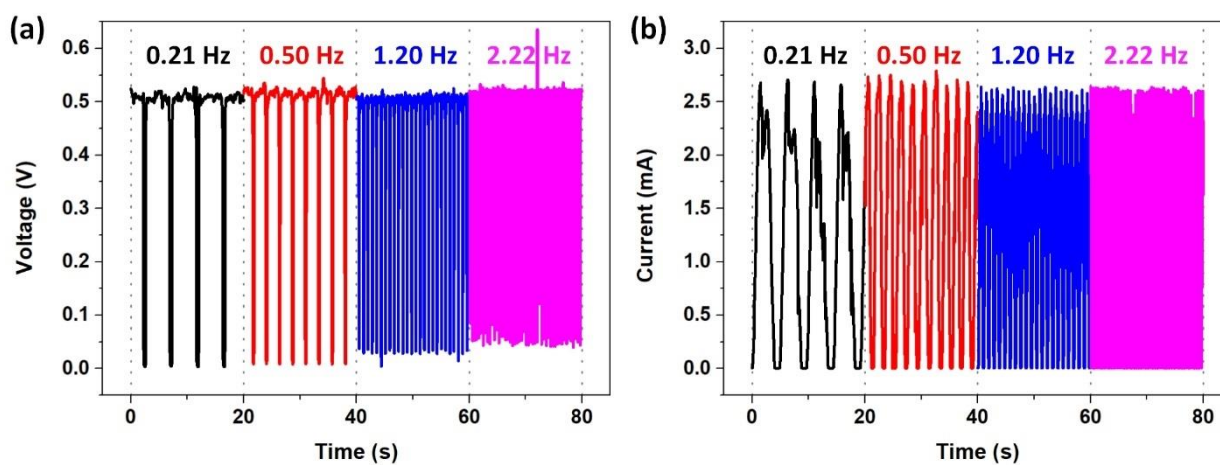

**Figure S5.** (a) The open-circuit voltage and (b) short-circuit current of the SLITF-TEG under different vibration frequencies.

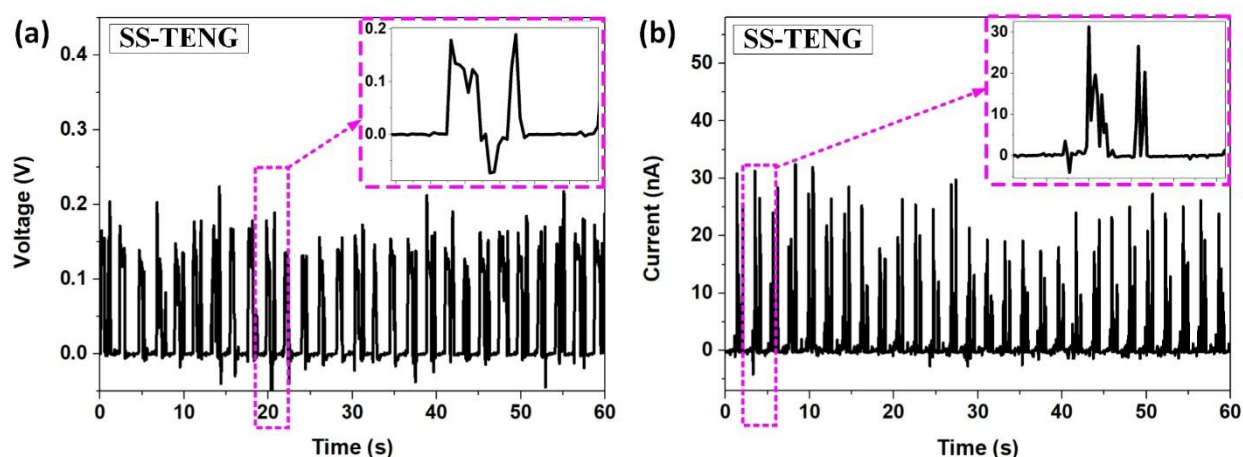

Figure S6. (a) The open-circuit voltage and (b) short-circuit current of the SS-TEG using a dry cellulose foam.

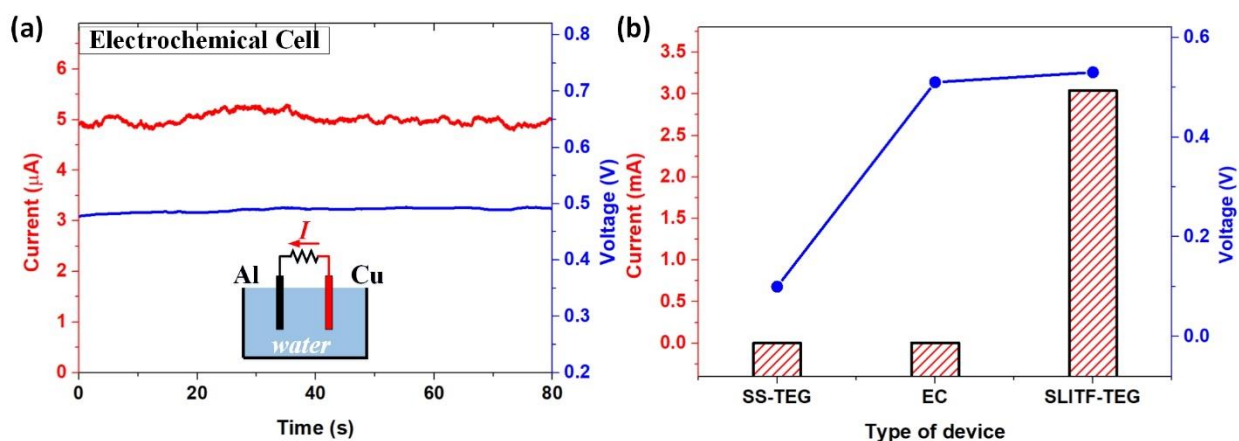

Figure S7. (a) The open-circuit voltage and short-circuit current of an electrochemical cell. (b) The comparison in output performances of SS-TEG, EC, and SLITF-TEG.

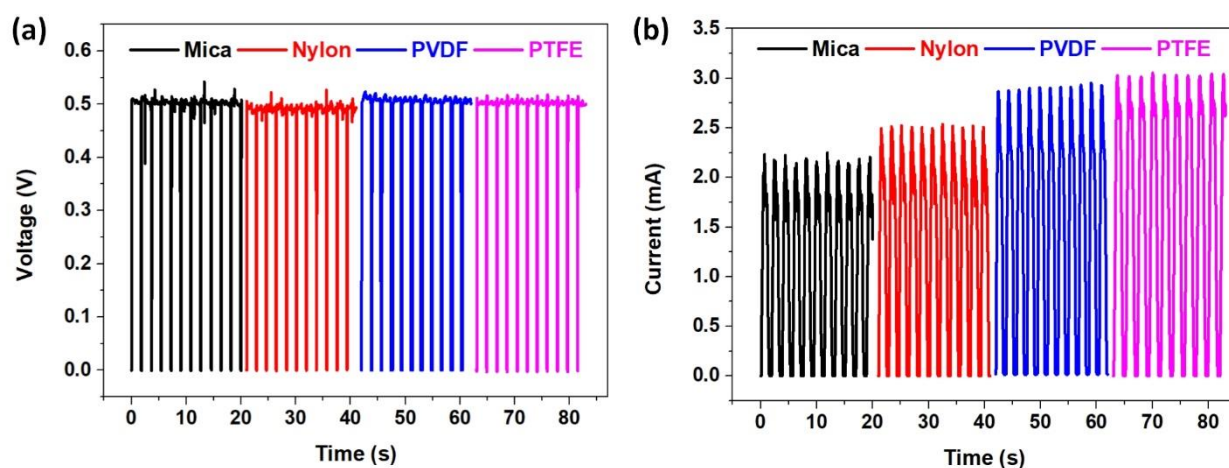

Figure S8. (a) The open-circuit voltage and (b) short-circuit current of the SLITF-TEG using different materials of the dielectric layer.

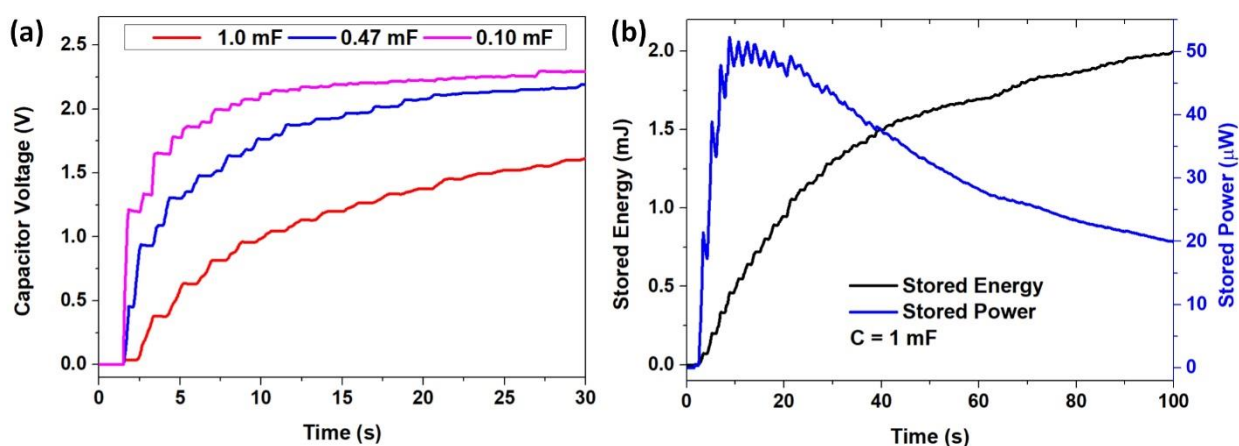

**Figure S9.** (a) Charging behaviors of six-unit cells of SLITF-TEG at different load capacitances. (b) Stored energy-time and stored power-time relationships for a fixed capacitor of 1 mF.

**Video S1:** Measurement of the open-circuit voltage

**Video S2:** Measurement of the short-circuit current

**Video S3:** SLITF-TEG directly charges a 6.8 mF capacitor

**Video S4:** Six-unit cells of SLITF-TEG directly power a light-emitting diode
