# Supplementary material for: Enhancing the Performance of Triboelectric Generator: A Novel Approach Using Solid–Liquid Interface-Treated Foam and Metal Contacts
Source: Polymers (Basel). 2023 May 20;15(10):2392. doi: 10.3390/polym15102392 (PMC10220941; doi:10.3390/polym15102392)
Supplement: Supplementary file 1 [file polymers-15-02392-s001.zip]

Archive with 5 entries (5 files):
- polymers-2336450-supplementary.pdf
- Supporting Information Video S1 - Open-Circuit Voltage.mp4
- Supporting Information Video S2 - Short-Circuit Current.mp4
- Supporting Information Video S3-Charging behavior of capacitor.mp4
- Supporting Information Video S4-6 cells directly power a LED.mp4
